# Supplementary material for: Planned, ongoing and completed tuberculosis treatment trials in Brazil, Russia, India, China and South Africa: a 2019 cross-sectional descriptive analysis
Source: HighWire-hosted journal article supplement (doi:10.1136/bmjopen-2021-057941), 2022-06-01
Supplement: bmjopen-2021-057941supp001_data_supplement.pdf [file bmjopen-2021-057941supp001_data_supplement.pdf]

## Appendix 1

### Search terms

“isoniazid”, “rifampicin”, “pyrazinamide”, “ethambutol”, “streptomycin”, “rifabutin”, “kanamycin”, “amikacin”, “capreomycin”, “levofloxacin”, “moxifloxacin”, “ofloxacin”, “para-aminosalicylic acid”, “cycloserine”, “terizidone”, “ethionamide”, “protionamide”, “clofazimine”, “linezolid”, “amoxicillin/clavulanate”, “thioacetazone”, “imipenem/cilastatin”, “high-dose isoniazid”, “clarithromycin”, “bedaquiline”, “delamanid”, “meropenem”.

### Coding of variables

| Type of intervention |
|----------------------|
| Drug therapy         |
| Behavioral           |
| Dots                 |
| Supplementation      |
| Rehabilitation       |
| Surgery              |

| Age of participants      |                    |
|--------------------------|--------------------|
| Children                 | birth to 12 months |
|                          | 1 to 5 years       |
|                          | 6 to 12 years      |
| Adolescents only (<18)   | 13 to 17           |
| Adults only              | 18 and over        |
| Children and Adolescents |                    |
| Adolescents and adults   |                    |
| All ages                 |                    |
| Not Reported             |                    |

| <b>Ethics</b>           |
|-------------------------|
| Local                   |
| International           |
| Local and International |
| Not reported            |

| <b>Funding sources</b>     |
|----------------------------|
| Local Organisation         |
| International organisation |
| Multiple funding           |
| Industry                   |
| University                 |
| Hospital                   |
| Self funding               |
| Unclear                    |

| <b>Co-morbidities</b> |
|-----------------------|
| HIV/AIDS              |
| Diabetes              |
| Rheumatoid disease    |
| Multi-morbidity       |
| Not applicable        |

| <b>Type of drug treatment</b> |
|-------------------------------|
| New drug                      |
| New combination               |
| New treatment duration        |
| New dosage                    |
